# Supplementary material
Source: PubMed Central journal article supplement (PMC1885619)

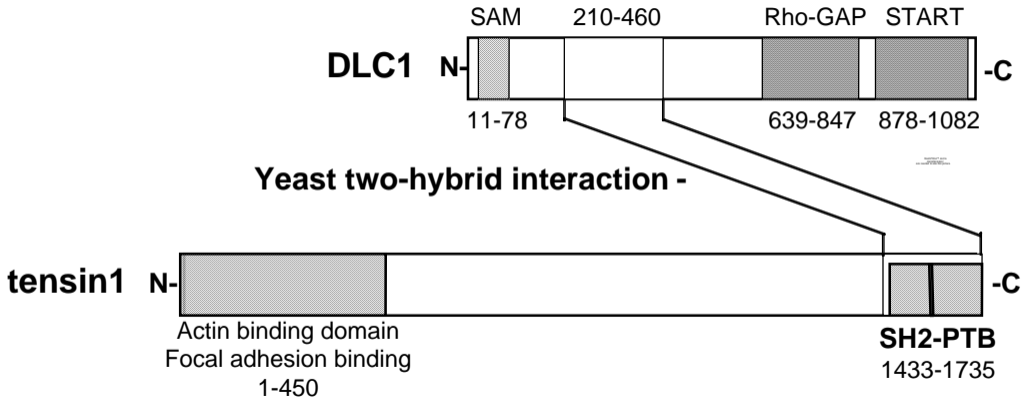

Supplement: pnas_0703033104_1.pdf [file pnas_0703033104_1.pdf]

**A.**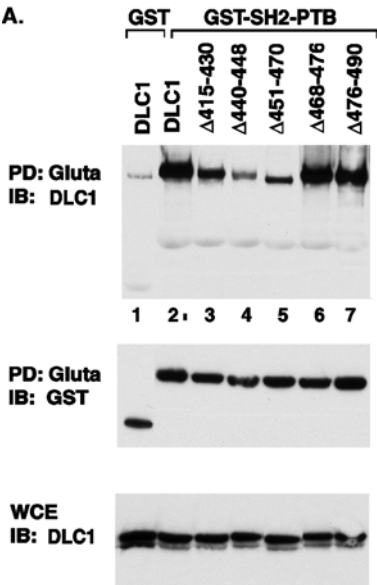**B.**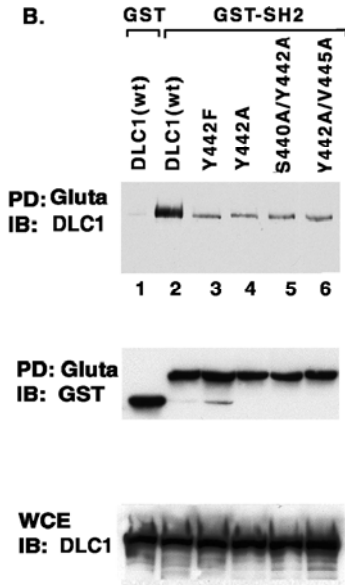

Supplement: pnas_0703033104_2.pdf [file pnas_0703033104_2.pdf]

| GST          | GST-PTB      |               |               |            |
|--------------|--------------|---------------|---------------|------------|
| GFP-DLC1(FL) | GFP-DLC1(FL) | GFP(400-1092) | GFP(500-1092) | GFP(1-400) |

PD: Gluta  
IB: GFP

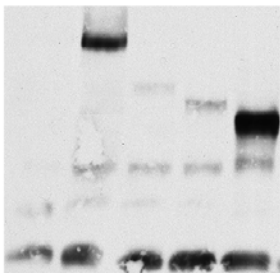

PD: Gluta  
IB: GST

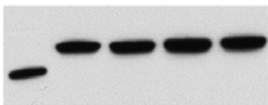

WCE  
IB: GFP

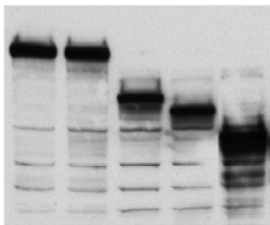

Supplement: pnas_0703033104_3.pdf [file pnas_0703033104_3.pdf]

**A.**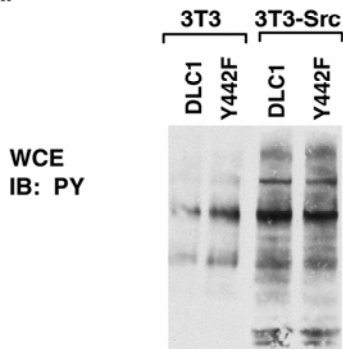

IP: DLC1  
IB: PY

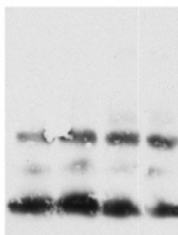

IP: DLC1  
Re-IB: DLC1

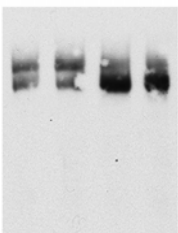**B.**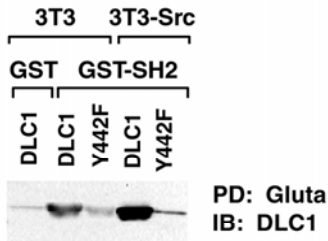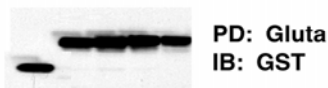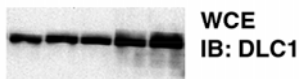

Supplement: pnas_0703033104_4.pdf [file pnas_0703033104_4.pdf]

**A.**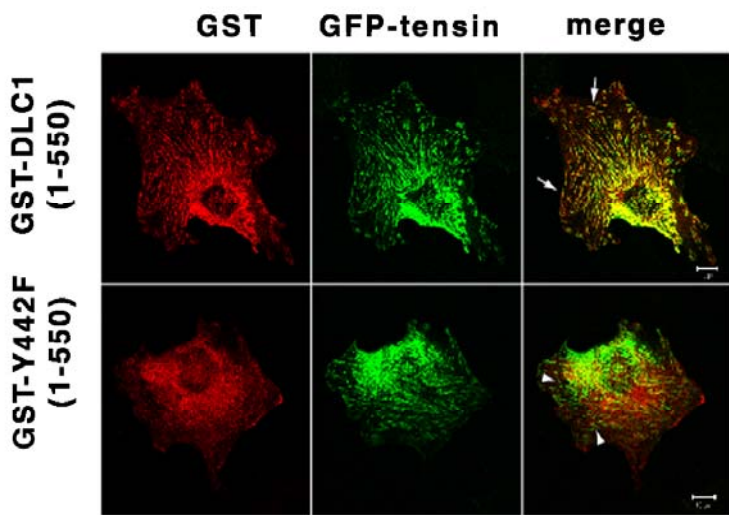**B.**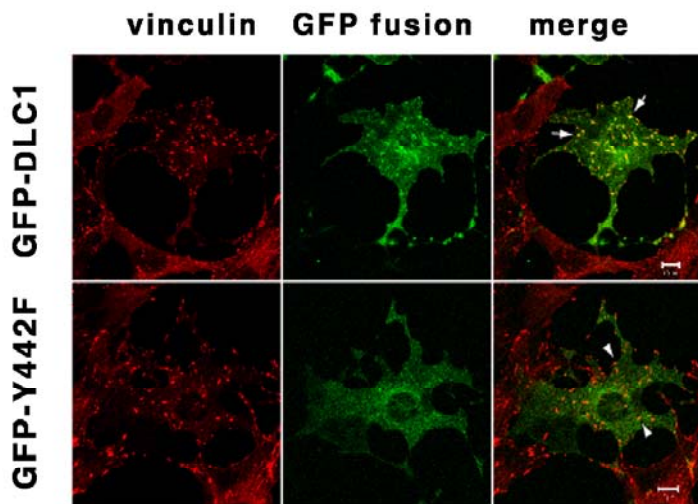

Supplement: pnas_0703033104_5.pdf [file pnas_0703033104_5.pdf]

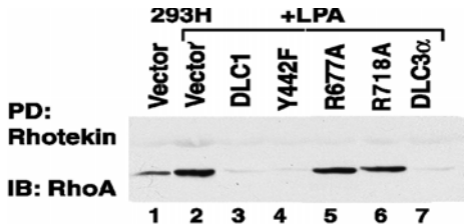

WCE  
IB: GFP

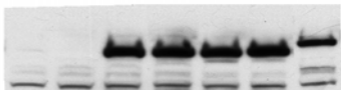

WCE  
IB: RhoA

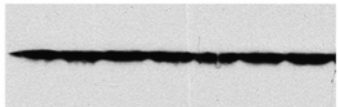

Supplement: pnas_0703033104_6.pdf [file pnas_0703033104_6.pdf]
